# Supplementary material
Source: PubMed Central journal article supplement (PMC2664369)

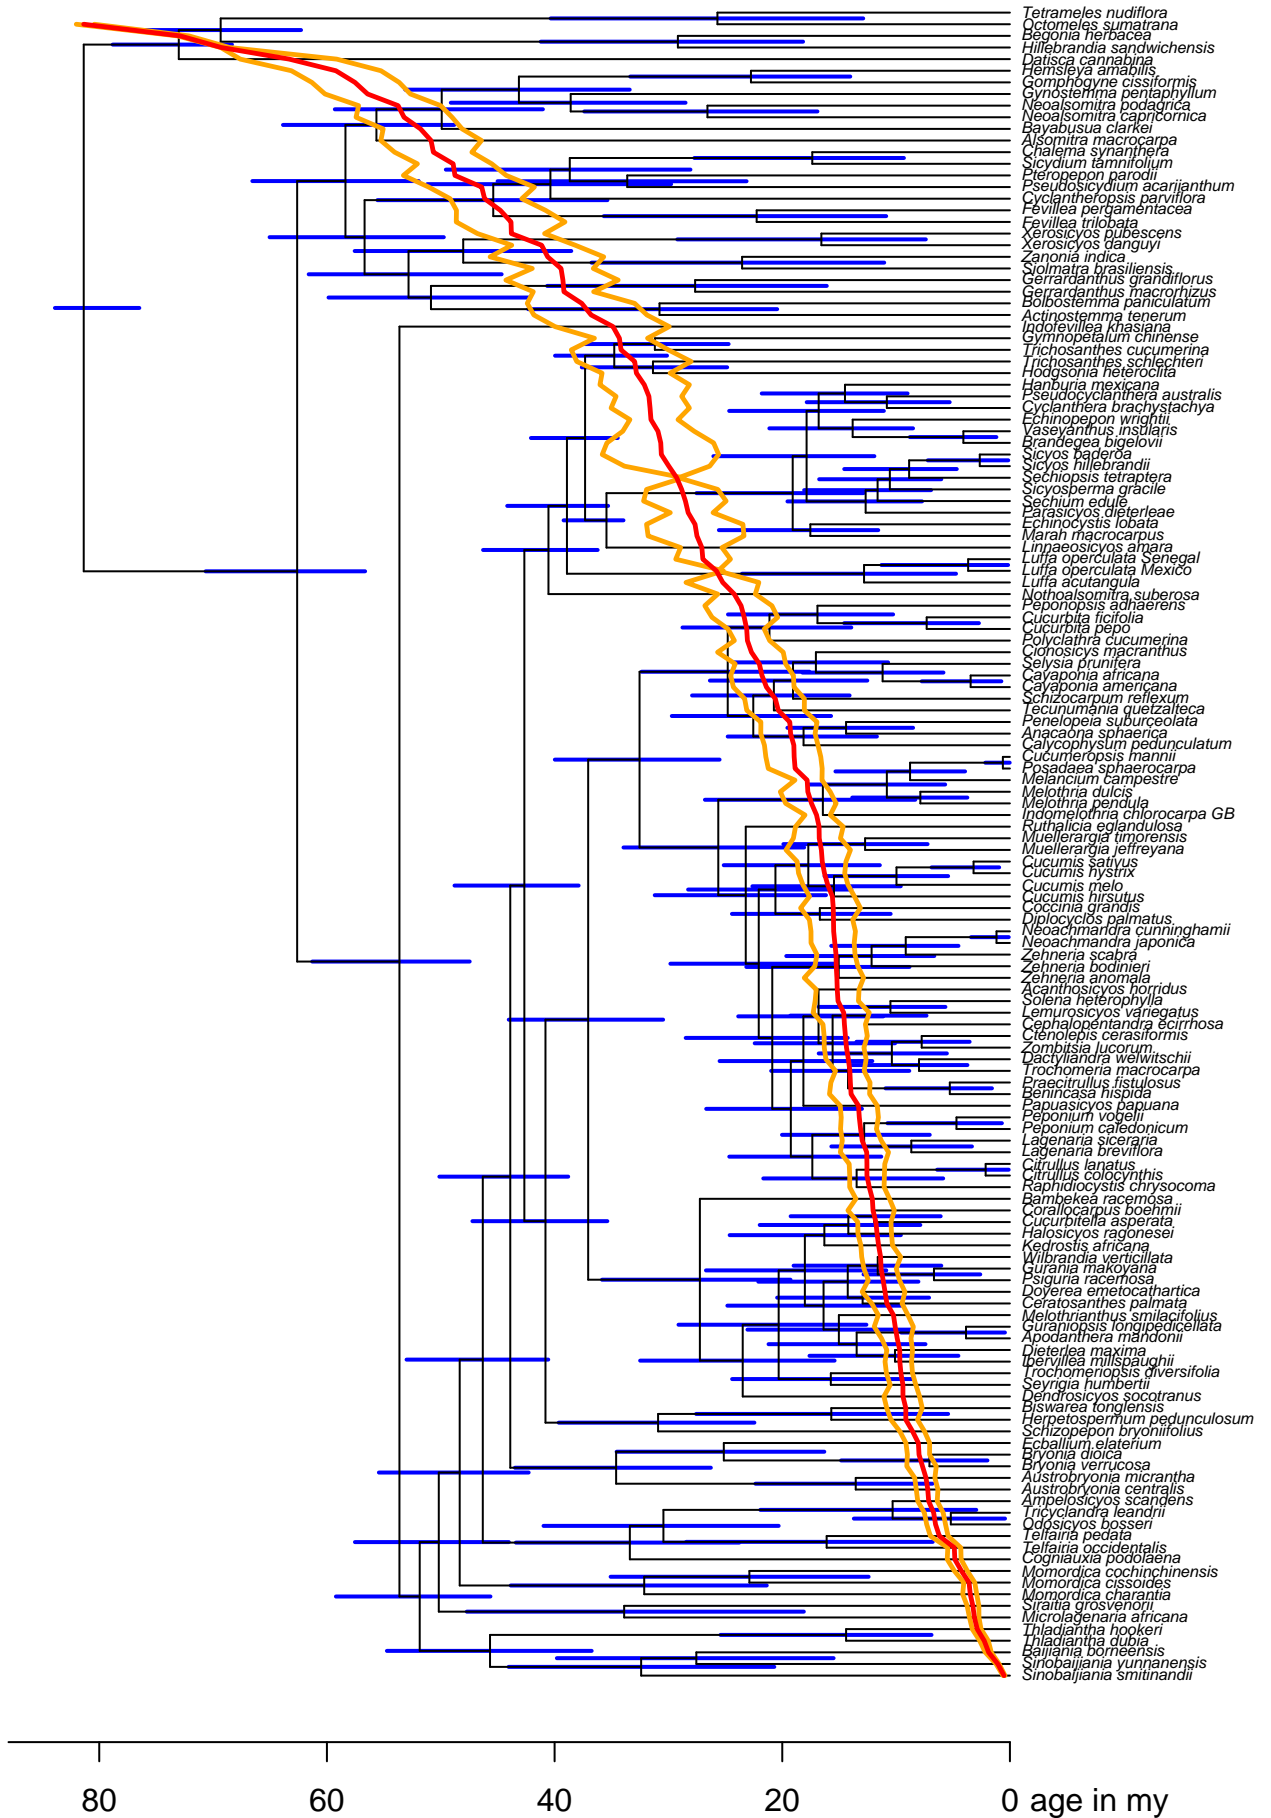

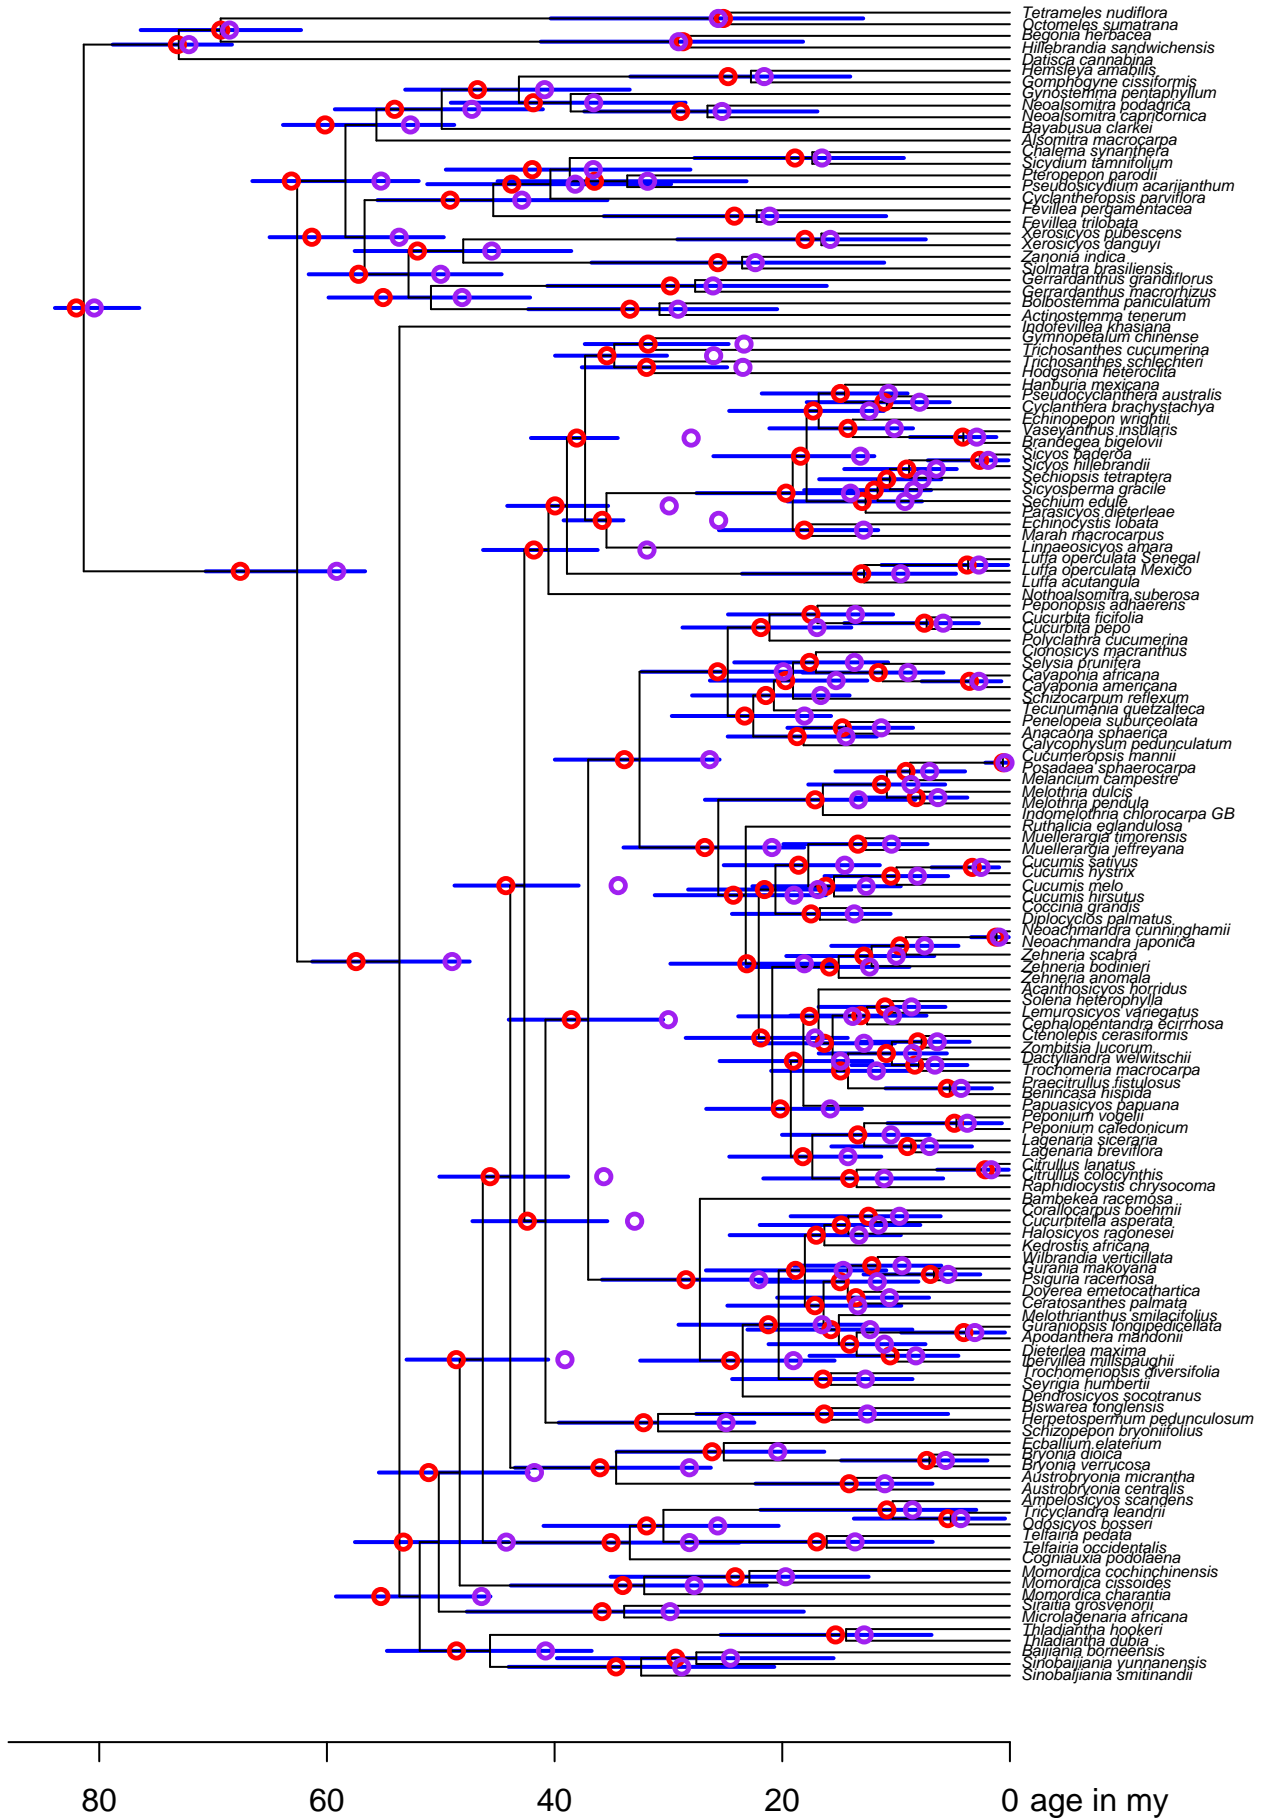

Supplement: rspb20081447s21.pdf [file rspb20081447s21.pdf]

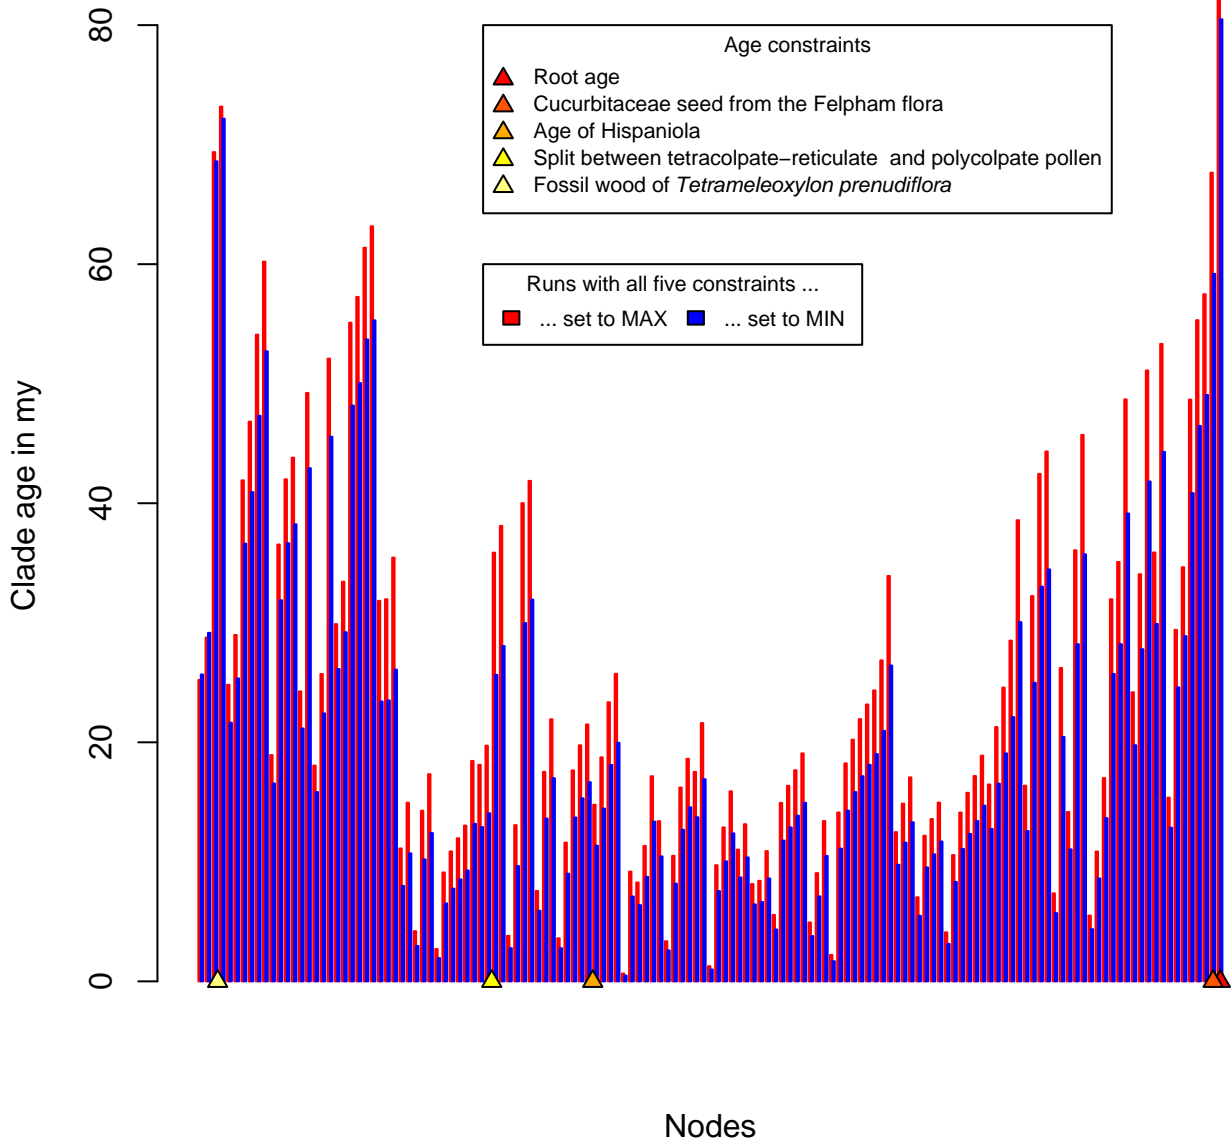

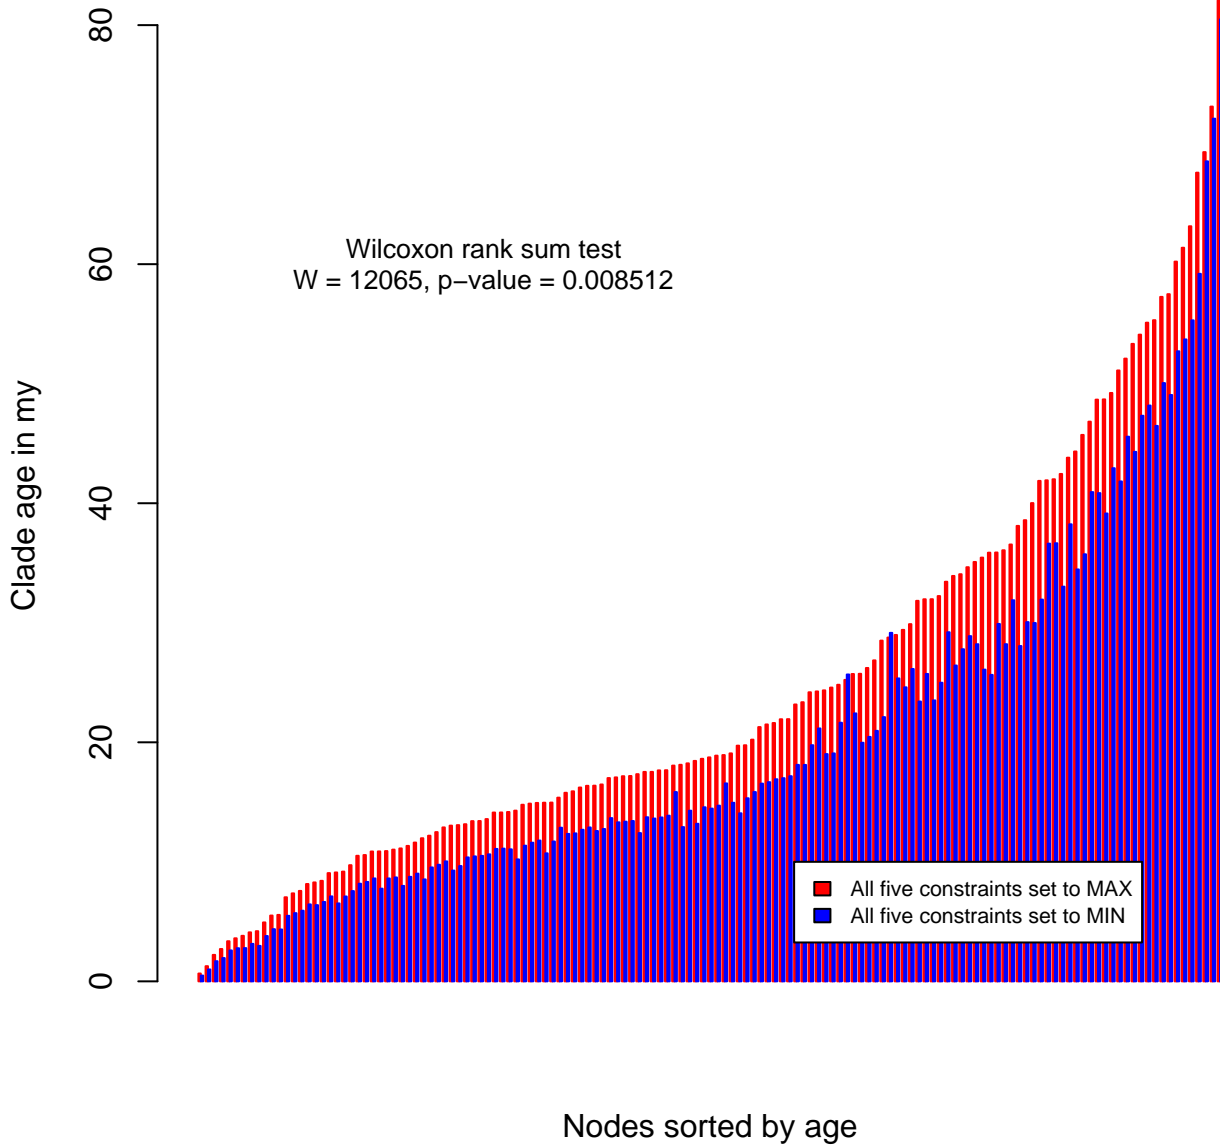

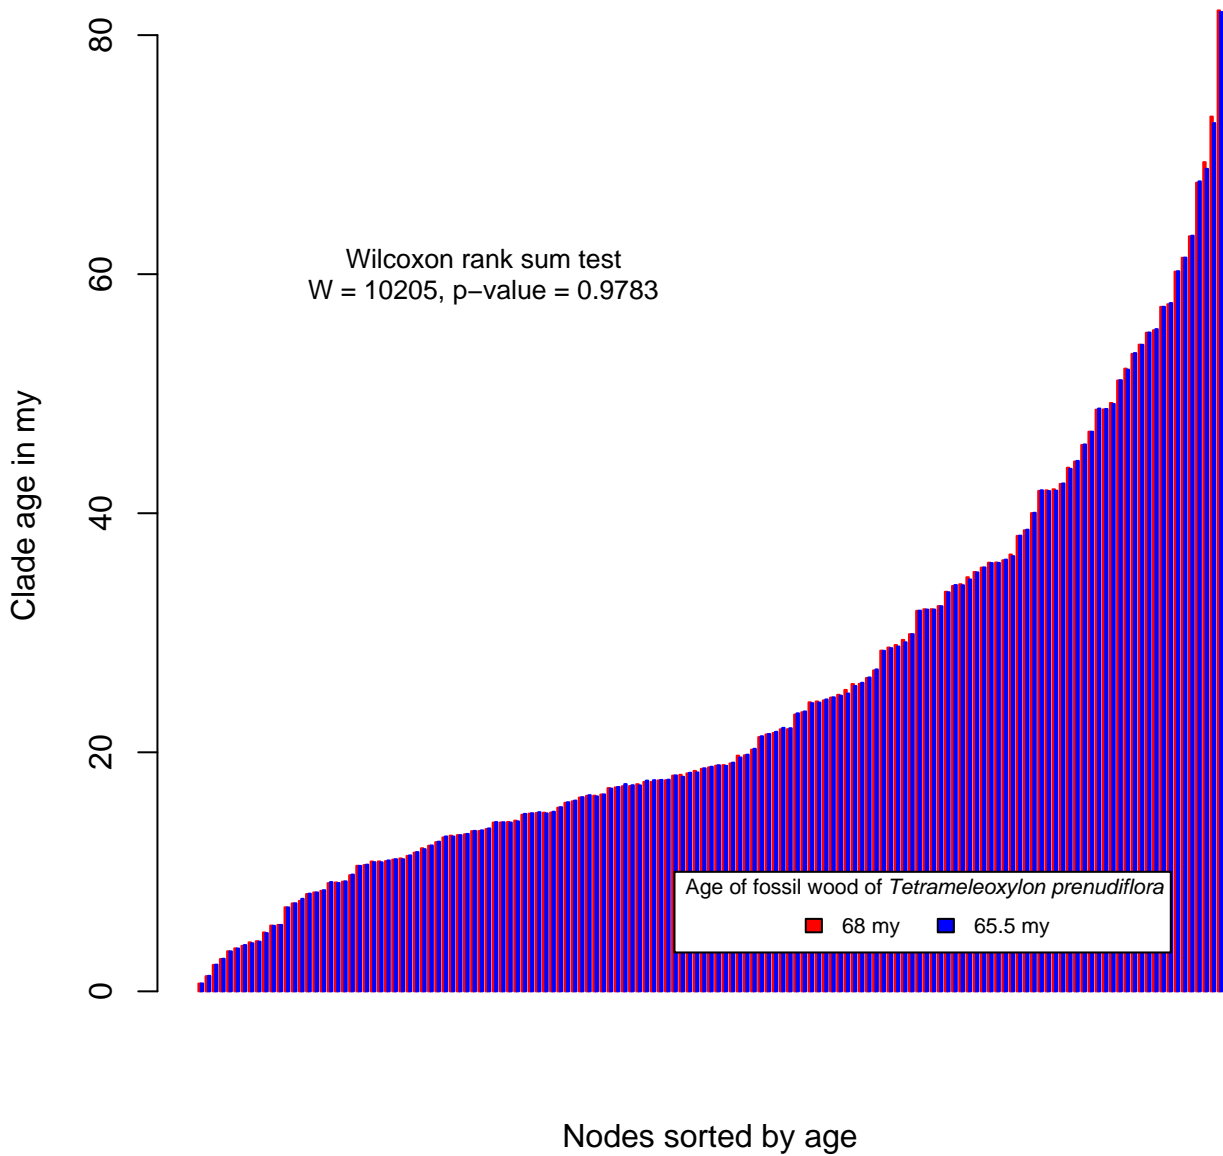

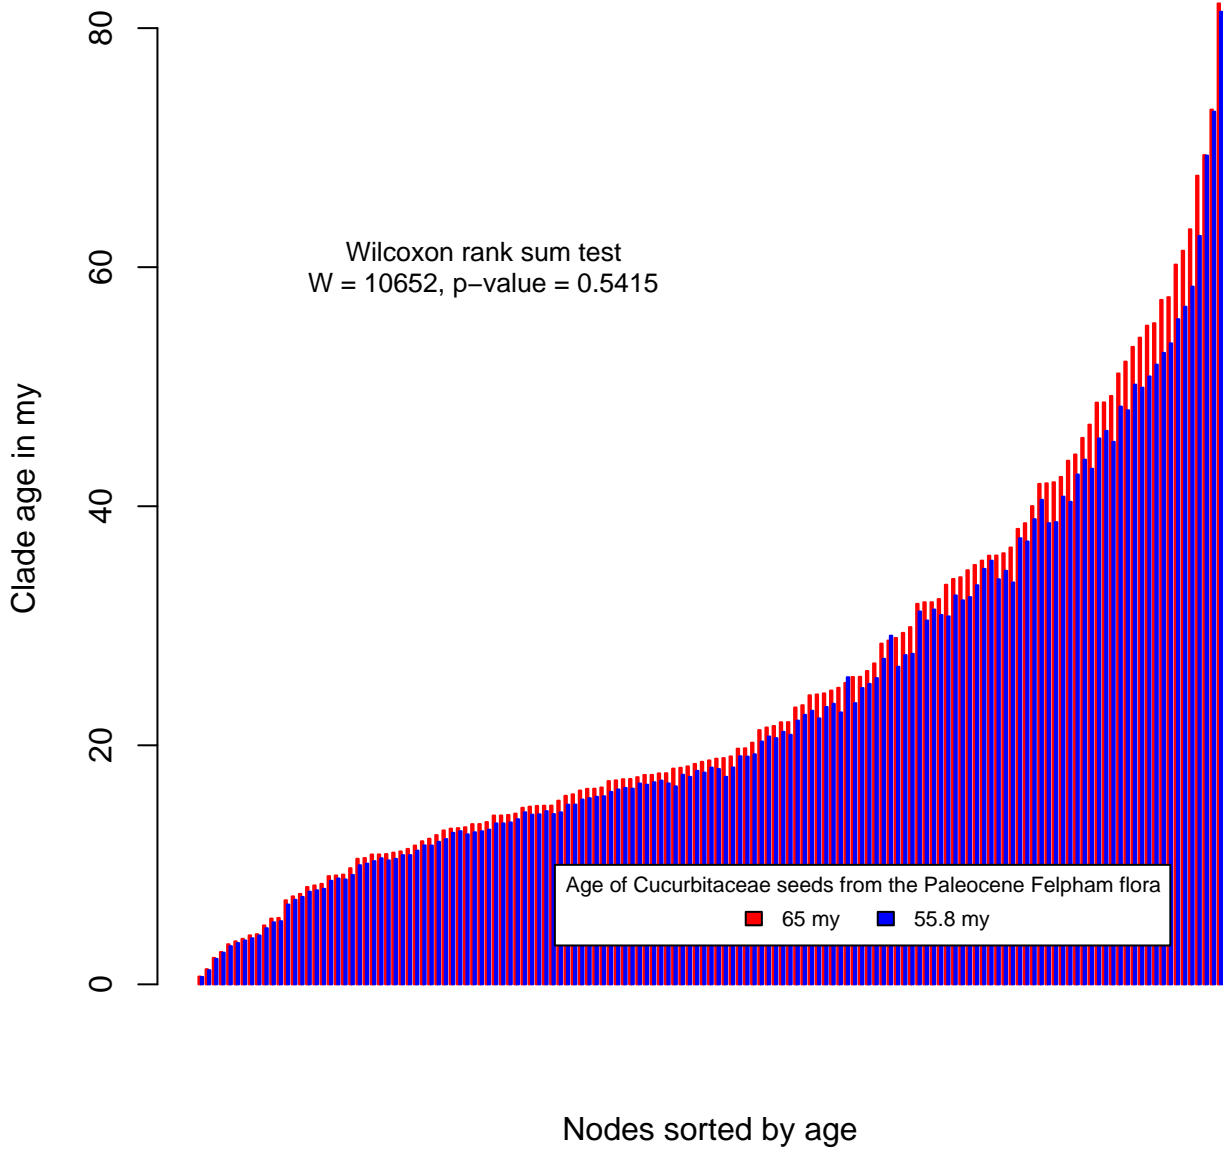

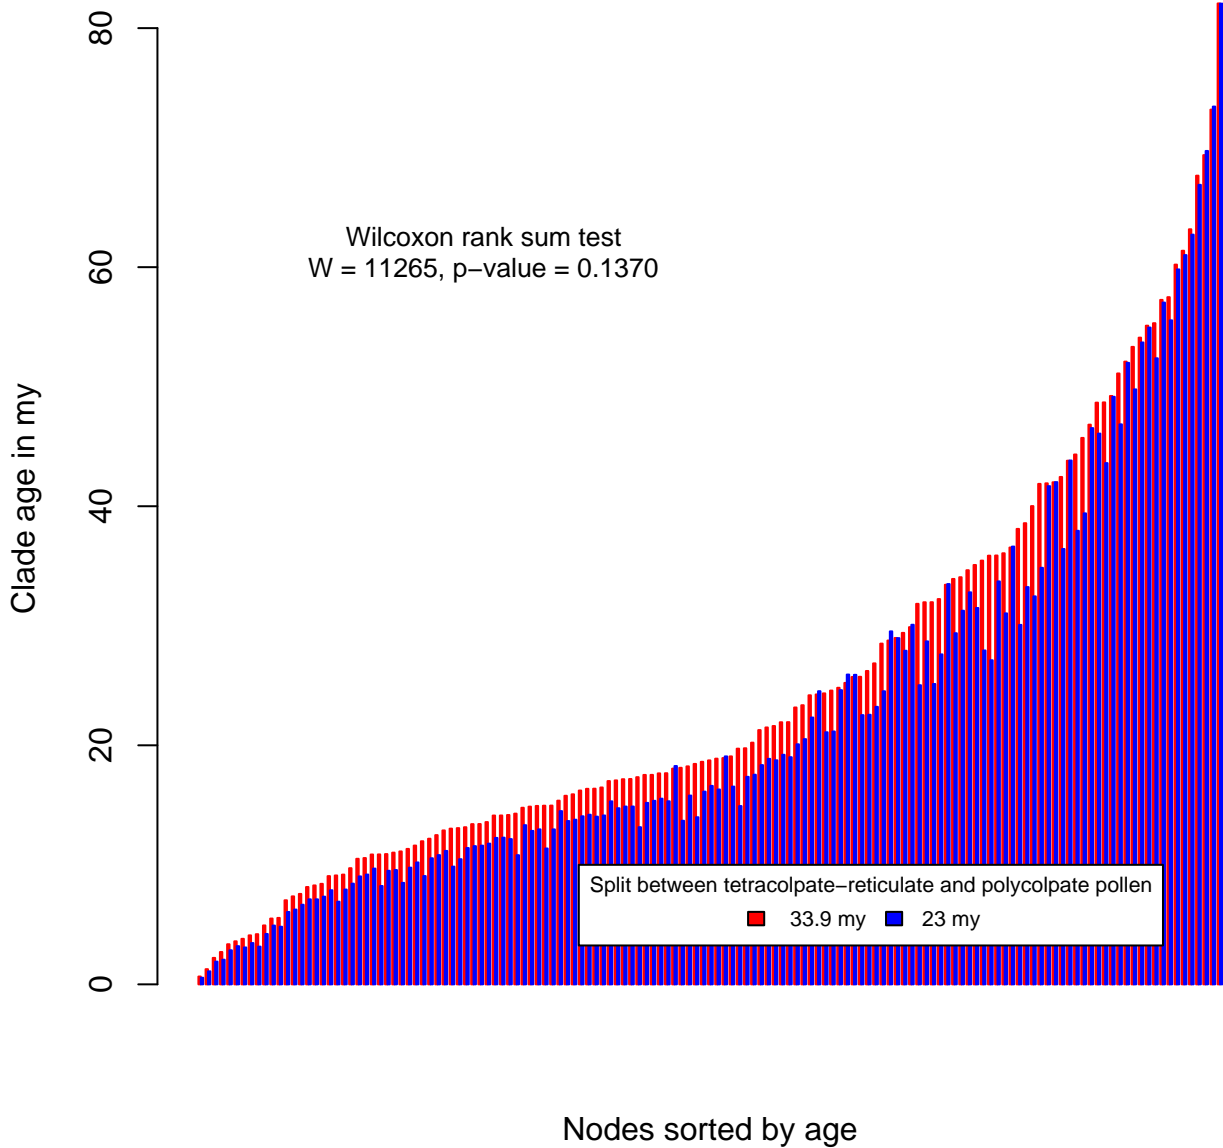

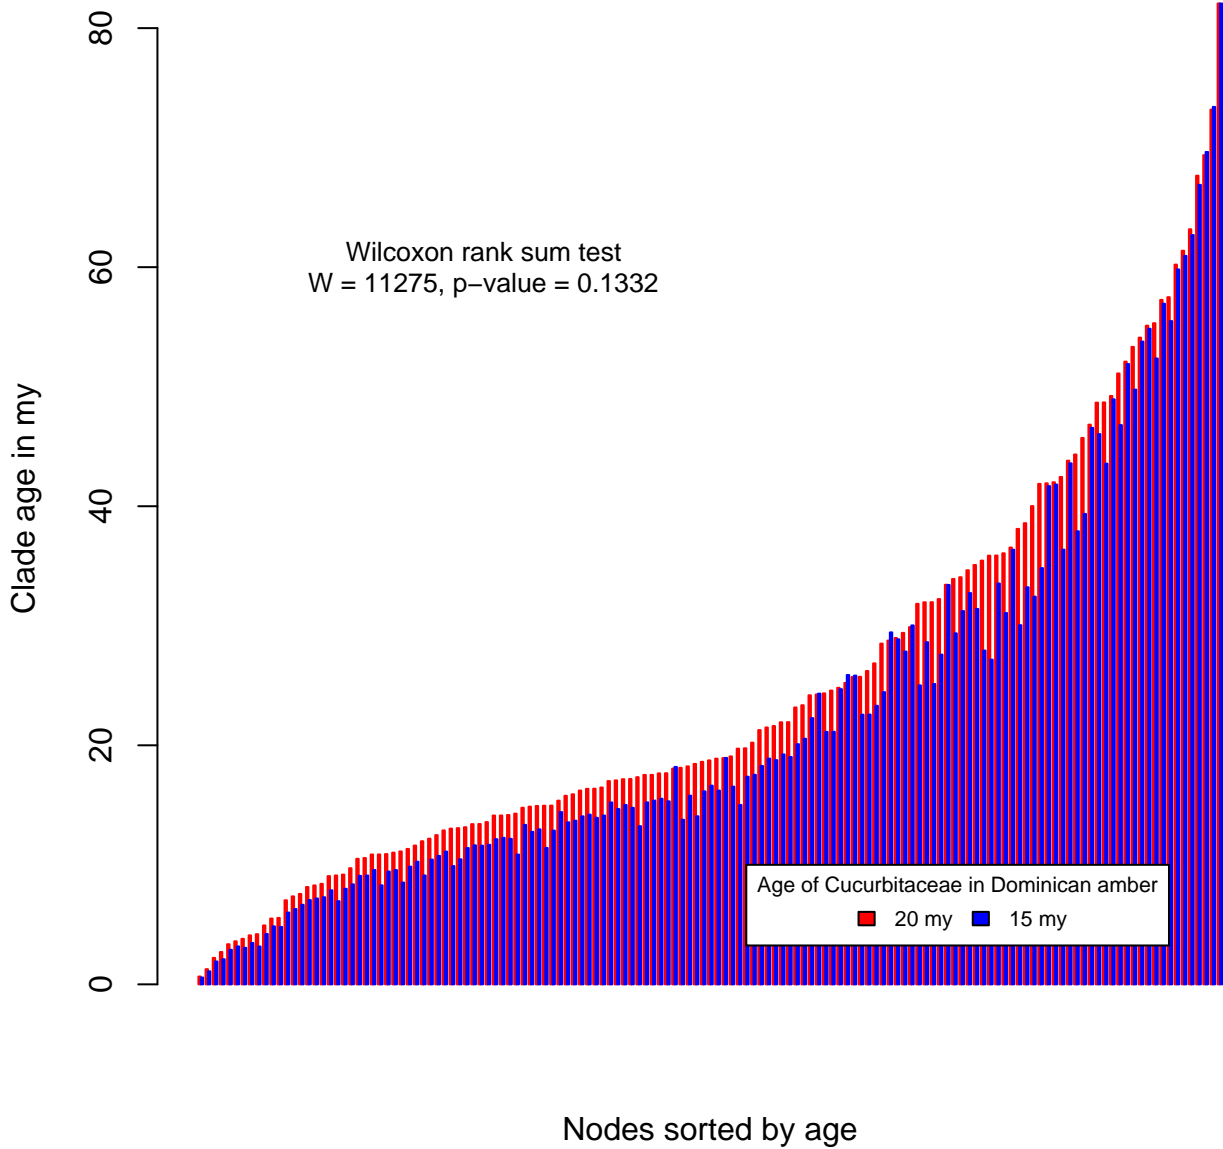

Supplement: rspb20081447s22.pdf [file rspb20081447s22.pdf]
